# Supplementary material for: Comparative Effectiveness of a Burnout Reduction Intervention for Behavioral Health Providers
Source: Atypon-hosted journal article supplement (doi:10.1176/appi.ps.201500220), 2016-04-01
Supplement: appi.ps.201500220.ds001.pdf [file appi.ps.201500220.ds001.pdf]

Supplemental Table. Descriptive Data for Study Outcomes by Condition and Time

| Outcomes                                      | Baseline |      | 6 Week |     | 6 Month |      | Baseline to 6 week change |     |     | Baseline to 6 month change |     |     | Pattern Mixture Model Study Condition by Time |     |     |
|-----------------------------------------------|----------|------|--------|-----|---------|------|---------------------------|-----|-----|----------------------------|-----|-----|-----------------------------------------------|-----|-----|
|                                               | Mean     | SD   | Mean   | SD  | Mean    | SD   | t                         | df  | p   | t                          | df  | p   | t                                             | df  | p   |
| <b>Emotional exhaustion</b>                   |          |      |        |     |         |      |                           |     |     |                            |     |     | .18                                           | 227 | .85 |
| Control                                       | 2.7      | 1.3  | 2.7    | 1.5 | 2.7     | 1.3  | -.13                      | 100 | .90 | -.44                       | 100 | .66 |                                               |     |     |
| BREATHE                                       | 2.8      | 1.3  | 2.6    | 1.5 | 2.5     | 1.4  | -1.73                     | 128 | .09 | -2.21                      | 128 | .03 |                                               |     |     |
| Total sample                                  | 2.8      | 1.3  | 2.7    | 1.5 | 2.6     | 1.4  |                           |     |     |                            |     |     |                                               |     |     |
| <b>Depersonalization</b>                      |          |      |        |     |         |      |                           |     |     |                            |     |     | .34                                           | 227 | .73 |
| Control                                       | 1.2      | 1.1  | 1.4    | 1.2 | 1.3     | 1.0  | .64                       | 100 | .52 | -.66                       | 100 | .51 |                                               |     |     |
| BREATHE                                       | 1.5      | 1.2  | 1.3    | 1.1 | 1.4     | 1.2  | -2.06                     | 128 | .04 | -1.29                      | 128 | .20 |                                               |     |     |
| Total sample                                  | 1.4      | 1.1  | 1.3    | 1.2 | 1.3     | 1.1  |                           |     |     |                            |     |     |                                               |     |     |
| <b>Personal accomplishment</b>                |          |      |        |     |         |      |                           |     |     |                            |     |     | -1.04                                         | 227 | .30 |
| Control                                       | 4.9      | .8   | 4.8    | 1.0 | 4.9     | .8   | -.84                      | 100 | .40 | .27                        | 100 | .79 |                                               |     |     |
| BREATHE                                       | 4.9      | .7   | 4.9    | .8  | 4.9     | .9   | .50                       | 128 | .61 | .90                        | 128 | .37 |                                               |     |     |
| Total sample                                  | 4.9      | .7   | 4.9    | .9  | 4.9     | .9   |                           |     |     |                            |     |     |                                               |     |     |
| <b>Provider expectations for clients</b>      |          |      |        |     |         |      |                           |     |     |                            |     |     | .82                                           | 221 | .41 |
| Control                                       | 3.5      | .7   | 3.6    | .6  | 3.6     | .6   | 1.15                      | 98  | .25 | .15                        | 98  | .88 |                                               |     |     |
| BREATHE                                       | 3.4      | .6   | 3.5    | .6  | 3.5     | .6   | 1.48                      | 124 | .14 | 2.01                       | 124 | .05 |                                               |     |     |
| Total sample                                  | 3.4      | .6   | 3.5    | .6  | 3.5     | .6   |                           |     |     |                            |     |     |                                               |     |     |
| <b>Job satisfaction</b>                       |          |      |        |     |         |      |                           |     |     |                            |     |     | .72                                           | 226 | .47 |
| Control                                       | 5.0      | 1.1  | 4.8    | 1.3 | 4.8     | 1.2  | -1.56                     | 99  | .12 | -1.89                      | 99  | .06 |                                               |     |     |
| BREATHE                                       | 5.0      | 1.4  | 5.0    | 1.5 | 5.1     | 1.4  | -.17                      | 128 | .87 | -.33                       | 128 | .75 |                                               |     |     |
| Total sample                                  | 5.0      | 1.3  | 4.9    | 1.4 | 4.9     | 1.3  |                           |     |     |                            |     |     |                                               |     |     |
| <b>Considered leaving job (past 6 months)</b> |          |      |        |     |         |      |                           |     |     |                            |     |     | -.13                                          | 226 | .89 |
| Control                                       | 4.8      | 1.5  | 4.7    | 1.8 | 4.9     | 1.5  | -1.00                     | 98  | .32 | -.85                       | 98  | .40 |                                               |     |     |
| BREATHE                                       | 4.7      | 1.7  | 4.7    | 1.9 | 4.8     | 1.7  | -.08                      | 128 | .94 | -.3                        | 128 | .77 |                                               |     |     |
| Total sample                                  | 4.7      | 1.6  | 4.7    | 1.9 | 4.8     | 1.6  |                           |     |     |                            |     |     |                                               |     |     |
| <b>Likely to leave job (next 6 months)</b>    |          |      |        |     |         |      |                           |     |     |                            |     |     | -1.29                                         | 226 | .20 |
| Control                                       | 3.4      | .9   | 3.3    | 1.0 | 3.3     | .9   | -.79                      | 99  | .43 | -.90                       | 99  | .37 |                                               |     |     |
| BREATHE                                       | 3.5      | .8   | 3.3    | 1.1 | 3.3     | 1.1  | -1.51                     | 128 | .13 | -1.67                      | 128 | .10 |                                               |     |     |
| Total sample                                  | 3.4      | .9   | 3.3    | 1.0 | 3.3     | 1.0  |                           |     |     |                            |     |     |                                               |     |     |
| <b>Vacation hours absent (last 6 months)</b>  |          |      |        |     |         |      |                           |     |     |                            |     |     | -.05                                          | 224 | .96 |
| Control                                       | 46.6     | 42.6 | n/a    | n/a | 50.5    | 36.6 | n/a                       | n/a | n/a | .81                        | 99  | .42 |                                               |     |     |

|                                          |      |      |     |     |      |      |       |     |     |       |     |     |       |     |     |
|------------------------------------------|------|------|-----|-----|------|------|-------|-----|-----|-------|-----|-----|-------|-----|-----|
| BREATHE                                  | 47.3 | 36.9 | n/a | n/a | 49.5 | 31.5 | n/a   | n/a | n/a | .64   | 128 | .52 |       |     |     |
| Total sample                             | 47.0 | 39.6 | n/a | n/a | 49.9 | 33.5 |       |     |     |       |     |     |       |     |     |
| <b>Sick hours absent (last 6 months)</b> |      |      |     |     |      |      |       |     |     |       |     |     | 1.84  | 205 | .07 |
| Control                                  | 33.3 | 28.6 | n/a | n/a | 26.2 | 33.6 | n/a   | n/a | n/a | -.49  | 92  | .62 |       |     |     |
| BREATHE                                  | 25.9 | 23.1 | n/a | n/a | 24.1 | 20.4 | n/a   | n/a | n/a | -.44  | 116 | .66 |       |     |     |
| Total sample                             | 29.5 | 26.1 | n/a | n/a | 25.0 | 26.6 |       |     |     |       |     |     |       |     |     |
| <b>Work interferes with family</b>       |      |      |     |     |      |      |       |     |     |       |     |     | -.49  | 225 | .63 |
| Control                                  | 2.7  | 1.0  | 2.6 | 1.0 | 2.5  | .9   | -.97  | 99  | .34 | -1.43 | 99  | .15 |       |     |     |
| BREATHE                                  | 2.9  | 1.0  | 2.7 | .9  | 2.7  | 1.0  | -1.61 | 127 | .11 | -1.73 | 127 | .09 |       |     |     |
| Total sample                             | 2.8  | 1.0  | 2.7 | 1.0 | 2.6  | 1.0  |       |     |     |       |     |     |       |     |     |
| <b>Family interferes with work</b>       |      |      |     |     |      |      |       |     |     |       |     |     | -1.83 | 225 | .07 |
| Control                                  | 1.9  | .7   | 2.0 | .9  | 2.1  | .9   | .92   | 99  | .36 | .88   | 99  | .38 |       |     |     |
| BREATHE                                  | 2.1  | .8   | 2.0 | .8  | 1.9  | .8   | -1.56 | 127 | .12 | -1.43 | 127 | .16 |       |     |     |
| Total sample                             | 2.0  | .8   | 2.0 | .8  | 2.0  | .8   |       |     |     |       |     |     |       |     |     |

Notes: At Baseline, n=145; at 6 weeks, n=127; at 6 months, n=108 for the total sample.

SD=Standard Deviation; n/a=not applicable

Emotional exhaustion and depersonalization mean item scores range from 0 to 6 with higher scores indicating more burnout; Personal accomplishment mean item scores range from 0 to 6 with higher scores indicating less burnout; Provider expectation scores range from 1 to 5 with higher scores indicating more optimistic expectations; Job satisfaction scores range from 1 to 7 with higher scores indicating greater satisfaction; Turnover intention scores for considering leaving in last 6 months range from 1 to 6 with higher scores indicating less frequent consideration of leaving; Turnover intention scores for likely to leave position range from 1 to 4 with higher scores indicating lower likelihood of leaving; Family and work interference scores range from 1 to 5 with higher scores indicating more interference.
